# Supplementary material for: Comparison of methods for estimating the attributable risk in the context of survival analysis
Source: Springer Nature journal article supplement (doi:10.1186/s12874-016-0285-1), 2017-01-23
Supplement: MOESM1 [file 12016316]

**Table S1 Simulation results for the estimation of attributable risk  $A(\cdot)$  under proportional hazards, constant baseline hazard ( $\gamma = 1$ ) with regression parameter  $\beta = \ln(2)$  and probability of exposure  $q = 0.25$**

| Estimation method | Time      | $A(t)$ | $n = 1,000$ |          |          |       | $n = 10,000$ |          |          |       |
|-------------------|-----------|--------|-------------|----------|----------|-------|--------------|----------|----------|-------|
|                   |           |        | Bias        | SEE      | SSD      | CP    | Bias         | SEE      | SSD      | CP    |
| KM                | $\tau/4$  | 0.166  | 0.000767    | 0.037566 | 0.037107 | 0.957 | -0.000344    | 0.011889 | 0.011883 | 0.954 |
|                   | $\tau/2$  | 0.136  | 0.000318    | 0.026562 | 0.026090 | 0.954 | -0.000062    | 0.008412 | 0.008505 | 0.948 |
|                   | $3\tau/4$ | 0.111  | 0.000345    | 0.022928 | 0.022308 | 0.958 | -0.000162    | 0.007283 | 0.007317 | 0.951 |
|                   | $\tau$    | 0.090  | 0.000608    | 0.027222 | 0.033360 | 0.921 | 0.000311     | 0.010786 | 0.012074 | 0.951 |
| WKM               | $\tau/4$  | 0.166  | 0.000772    | 0.037668 | 0.036910 | 0.959 | -0.000311    | 0.011871 | 0.011871 | 0.954 |
|                   | $\tau/2$  | 0.136  | 0.000310    | 0.026405 | 0.025910 | 0.961 | -0.000018    | 0.008350 | 0.008425 | 0.947 |
|                   | $3\tau/4$ | 0.111  | 0.000490    | 0.022436 | 0.022317 | 0.954 | -0.000149    | 0.007161 | 0.007210 | 0.955 |
|                   | $\tau$    | 0.090  | 0.000011    | 0.023394 | 0.027320 | 0.908 | 0.000035     | 0.009801 | 0.010984 | 0.926 |
| COX               | $\tau/4$  | 0.166  | 0.000446    | 0.028454 | 0.027789 | 0.962 | -0.000238    | 0.009000 | 0.009034 | 0.950 |
|                   | $\tau/2$  | 0.136  | 0.000327    | 0.022835 | 0.022332 | 0.957 | -0.000132    | 0.007217 | 0.007226 | 0.952 |
|                   | $3\tau/4$ | 0.111  | 0.000112    | 0.018279 | 0.017625 | 0.962 | -0.000202    | 0.005767 | 0.005767 | 0.953 |
|                   | $\tau$    | 0.090  | 0.000947    | 0.015938 | 0.016030 | 0.947 | -0.000031    | 0.005241 | 0.005310 | 0.950 |
| PCH               | $\tau/4$  | 0.166  | 0.000672    | 0.027455 | 0.027806 | 0.956 | -0.000210    | 0.008677 | 0.009038 | 0.938 |
|                   | $\tau/2$  | 0.136  | 0.000474    | 0.021919 | 0.022349 | 0.950 | -0.000116    | 0.006924 | 0.007227 | 0.940 |
|                   | $3\tau/4$ | 0.111  | 0.000145    | 0.017434 | 0.017630 | 0.953 | -0.000208    | 0.005502 | 0.005761 | 0.944 |
|                   | $\tau$    | 0.090  | 0.000344    | 0.014600 | 0.014513 | 0.952 | -0.000189    | 0.004577 | 0.004667 | 0.949 |
| Simpler           | -         | 0.200  | 0.000623    | 0.033982 | 0.034253 | 0.955 | -0.000295    | 0.010748 | 0.011128 | 0.939 |

*KM* nonparametric approach based on Kaplan-Meier estimation for  $S(t)$ ,

*WKM* nonparametric approach based on weighted Kaplan-Meier estimation for  $S(t)$ ,

*COX* semiparametric approach, *PCH* parametric approach using a piecewise constant hazards model,

*Simpler* simpler approach based on proportion of exposed subjects,

*Bias* sampling mean of the difference between  $\hat{A}(t)$  and  $A(t)$ ,

*SEE* sampling mean of standard error estimate of  $A(t)$ ,

*SSD* sampling standard deviation of  $\hat{A}(t)$ ,

*CP* coverage probability of the 95% Wald confidence interval
