# Supplementary material for: Comparison of methods for estimating the attributable risk in the context of survival analysis
Source: Springer Nature journal article supplement (doi:10.1186/s12874-016-0285-1), 2017-01-23
Supplement: MOESM2 [file 12016316]

**Table S2 Simulation results for the estimation of attributable risk  $A(\cdot)$  under proportional hazards, constant baseline hazard ( $\gamma = 1$ ) with regression parameter  $\beta = \ln(2)$  and probability of exposure  $q = 0.75$**

| Estimation method | Time      | $A(t)$ | $n = 1,000$ |          |          |       | $n = 10,000$ |          |          |       |
|-------------------|-----------|--------|-------------|----------|----------|-------|--------------|----------|----------|-------|
|                   |           |        | Bias        | SEE      | SSD      | CP    | Bias         | SEE      | SSD      | CP    |
| KM                | $\tau/4$  | 0.373  | -0.002134   | 0.075473 | 0.075167 | 0.956 | 0.000578     | 0.023935 | 0.024026 | 0.953 |
|                   | $\tau/2$  | 0.321  | -0.001817   | 0.058878 | 0.058752 | 0.944 | 0.000143     | 0.018721 | 0.018706 | 0.960 |
|                   | $3\tau/4$ | 0.273  | -0.001380   | 0.055677 | 0.058463 | 0.933 | 0.000299     | 0.017818 | 0.017566 | 0.950 |
|                   | $\tau$    | 0.229  | 0.002988    | 0.064332 | 0.079263 | 0.880 | -0.000864    | 0.026996 | 0.033048 | 0.923 |
| WKM               | $\tau/4$  | 0.373  | -0.002145   | 0.075537 | 0.075176 | 0.956 | 0.000561     | 0.023933 | 0.024012 | 0.953 |
|                   | $\tau/2$  | 0.321  | -0.001797   | 0.058865 | 0.058784 | 0.943 | 0.000131     | 0.018709 | 0.018715 | 0.959 |
|                   | $3\tau/4$ | 0.273  | -0.001410   | 0.055508 | 0.058293 | 0.933 | 0.000328     | 0.017795 | 0.017551 | 0.948 |
|                   | $\tau$    | 0.229  | 0.002194    | 0.063226 | 0.077751 | 0.879 | -0.000705    | 0.026799 | 0.032880 | 0.919 |
| COX               | $\tau/4$  | 0.373  | -0.002641   | 0.054982 | 0.055028 | 0.948 | 0.000035     | 0.017371 | 0.017306 | 0.955 |
|                   | $\tau/2$  | 0.321  | -0.001861   | 0.050909 | 0.050975 | 0.947 | 0.000099     | 0.016102 | 0.016095 | 0.952 |
|                   | $3\tau/4$ | 0.273  | -0.001044   | 0.046584 | 0.046373 | 0.952 | 0.000180     | 0.014736 | 0.014743 | 0.949 |
|                   | $\tau$    | 0.229  | 0.000817    | 0.043942 | 0.045675 | 0.944 | -0.000077    | 0.014623 | 0.015048 | 0.951 |
| PCH               | $\tau/4$  | 0.373  | -0.002187   | 0.054875 | 0.055066 | 0.949 | 0.000104     | 0.017318 | 0.017314 | 0.952 |
|                   | $\tau/2$  | 0.321  | -0.001530   | 0.050815 | 0.050969 | 0.946 | 0.000130     | 0.016052 | 0.016088 | 0.951 |
|                   | $3\tau/4$ | 0.273  | -0.000930   | 0.046465 | 0.046375 | 0.951 | 0.000192     | 0.014684 | 0.014709 | 0.948 |
|                   | $\tau$    | 0.229  | -0.000619   | 0.042921 | 0.043412 | 0.944 | 0.000102     | 0.013576 | 0.013704 | 0.948 |
| Simpler           | -         | 0.429  | -0.003536   | 0.058323 | 0.058297 | 0.951 | -0.000106    | 0.018358 | 0.018324 | 0.952 |

*KM* nonparametric approach based on Kaplan-Meier estimation for  $S(t)$ ,

*WKM* nonparametric approach based on weighted Kaplan-Meier estimation for  $S(t)$ ,

*COX* semiparametric approach, *PCH* parametric approach using a piecewise constant hazards model,

*Simpler* simpler approach based on proportion of exposed subjects,

*Bias* sampling mean of the difference between  $\hat{A}(t)$  and  $A(t)$ ,

*SEE* sampling mean of standard error estimate of  $A(t)$ ,

*SSD* sampling standard deviation of  $\hat{A}(t)$ ,

*CP* coverage probability of the 95% Wald confidence interval
