# Supplementary material for: Comparison of methods for estimating the attributable risk in the context of survival analysis
Source: Springer Nature journal article supplement (doi:10.1186/s12874-016-0285-1), 2017-01-23
Supplement: MOESM3 [file 12874_2016_285_MOESM3_ESM.pdf]

**Table S3 Simulation results for the estimation of attributable risk  $A(\cdot)$  under proportional hazards, constant baseline hazard ( $\gamma = 1$ ) with regression parameter  $\beta = 0$  and probability of exposure  $q = 0.5$**

| Estimation method | Time      | $A(t)$ | $n = 1,000$ |          |          |       | $n = 10,000$ |          |          |       |
|-------------------|-----------|--------|-------------|----------|----------|-------|--------------|----------|----------|-------|
|                   |           |        | Bias        | SEE      | SSD      | CP    | Bias         | SEE      | SSD      | CP    |
| KM                | $\tau/4$  | 0      | 0.001588    | 0.066720 | 0.066661 | 0.951 | 0.000298     | 0.021095 | 0.020829 | 0.959 |
|                   | $\tau/2$  | 0      | 0.001831    | 0.049184 | 0.049848 | 0.945 | 0.000730     | 0.015565 | 0.015568 | 0.940 |
|                   | $3\tau/4$ | 0      | 0.000775    | 0.044459 | 0.044906 | 0.948 | -0.000044    | 0.014117 | 0.014006 | 0.950 |
|                   | $\tau$    | 0      | 0.003632    | 0.054707 | 0.063368 | 0.921 | 0.001753     | 0.021781 | 0.024252 | 0.955 |
| WKM               | $\tau/4$  | 0      | 0.001584    | 0.066767 | 0.066675 | 0.951 | 0.000300     | 0.021097 | 0.020840 | 0.959 |
|                   | $\tau/2$  | 0      | 0.001849    | 0.049203 | 0.049846 | 0.946 | 0.000731     | 0.015568 | 0.015582 | 0.940 |
|                   | $3\tau/4$ | 0      | 0.000670    | 0.044428 | 0.044884 | 0.948 | -0.000039    | 0.014115 | 0.014006 | 0.951 |
|                   | $\tau$    | 0      | 0.002958    | 0.052653 | 0.060895 | 0.905 | 0.001605     | 0.021354 | 0.024770 | 0.948 |
| COX               | $\tau/4$  | 0      | 0.001693    | 0.047709 | 0.047293 | 0.961 | 0.000334     | 0.015079 | 0.014993 | 0.958 |
|                   | $\tau/2$  | 0      | 0.001521    | 0.042265 | 0.041903 | 0.963 | 0.000294     | 0.013349 | 0.013276 | 0.958 |
|                   | $3\tau/4$ | 0      | 0.001314    | 0.037280 | 0.036941 | 0.963 | 0.000261     | 0.011758 | 0.011698 | 0.958 |
|                   | $\tau$    | 0      | 0.001276    | 0.032920 | 0.032690 | 0.962 | 0.000222     | 0.010319 | 0.010275 | 0.958 |
| PCH               | $\tau/4$  | 0      | 0.001755    | 0.047745 | 0.047311 | 0.961 | 0.000335     | 0.015080 | 0.014992 | 0.959 |
|                   | $\tau/2$  | 0      | 0.001581    | 0.042294 | 0.041918 | 0.962 | 0.000295     | 0.013349 | 0.013274 | 0.959 |
|                   | $3\tau/4$ | 0      | 0.001378    | 0.037290 | 0.036950 | 0.962 | 0.000262     | 0.011757 | 0.011694 | 0.959 |
|                   | $\tau$    | 0      | 0.001248    | 0.032792 | 0.032573 | 0.963 | 0.000221     | 0.010312 | 0.010254 | 0.959 |
| Simpler           | -         | 0      | 0.043998    | 0.053626 | 0.033774 | 0.961 | 0.013205     | 0.016996 | 0.009928 | 0.957 |

*KM* nonparametric approach based on Kaplan-Meier estimation for  $S(t)$ ,

*WKM* nonparametric approach based on weighted Kaplan-Meier estimation for  $S(t)$ ,

*COX* semiparametric approach, *PCH* parametric approach using a piecewise constant hazards model,

*Simpler* simpler approach based on proportion of exposed subjects,

*Bias* sampling mean of the difference between  $\hat{A}(t)$  and  $A(t)$ ,

*SEE* sampling mean of standard error estimate of  $A(t)$ ,

*SSD* sampling standard deviation of  $\hat{A}(t)$ ,

*CP* coverage probability of the 95% Wald confidence interval
